# Supplementary material for: A simple label-free aptamer-based method for C-reactive protein detection
Source: Royal Society of Chemistry journal article supplement (doi:10.1039/c6ay01007e), 2016-01-01
Supplement: c6ay01007e1.pdf [file c6ay01007e1.pdf]

## Electronic Supplementary Information (ESI)

### **A simple label-free aptamer-based method for C-reactive protein detection**

Bin Wu, Nandi Chen, Qing Wang, Xiaohai Yang,\* Kemin Wang,\* Wenshan Li, Qing Li, Wenjing Liu, Hongmei Fang

State Key Laboratory of Chemo/Biosensing and Chemometrics, College of Chemistry and Chemical Engineering, Key Laboratory for Bio-Nanotechnology and Molecule Engineering of Hunan Province, Hunan University, Changsha, China 410082.

E-mail: yangxiaohai@hnu.edu.cn, kmwang@hnu.edu.cn; Tel/Fax: +86 731 88821566.

## 1 Fluorescence characteristic between 6th-62-40 and ThT.

The plot of fluorescence emission intensity of ThT with the aptamer 6th-62-40 provided in Figure S1. In the present of 100 nM 6th-62-40, the fluorescence emission intensity on 490 nm versus ThT concentration was obtained. It obtained a binding constant  $K_a = 1.63 \times 10^5 \text{ M}^{-1}$  between aptamer and ThT.

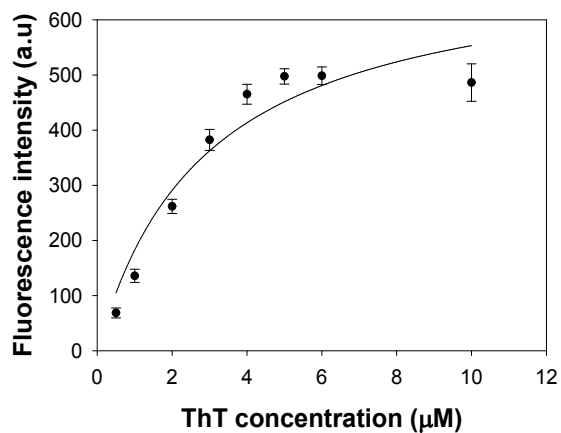

**Fig. S1** The fluorescence emission intensity on 490 nm versus ThT concentration in the present of 100 nM G-rich aptamer 6th-62-40.  $\lambda_{\text{ex}} = 425 \text{ nm}$ . Error bars showed the standard deviation of measurement taken from three experiments.

## 2 Optimization of experimental conditions.

In order to obtain the highest sensitive response, ThT concentration,  $K^+$  concentration, reaction temperature and incubation time were optimized. The concentration of CRP was 20 nM in all optimization experiment.

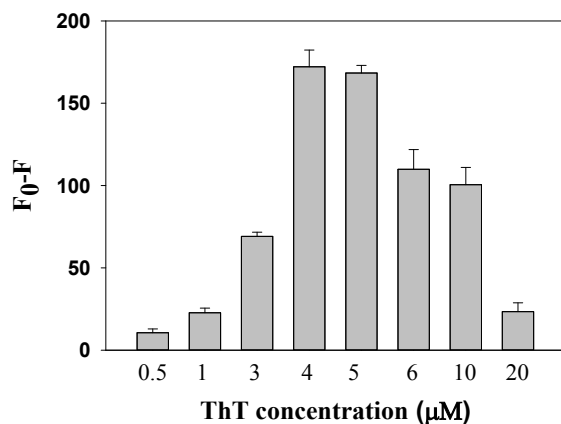

**Fig. S2** Optimization of concentration ThT. The fluorescence emission intensity on 490 nm versus ThT concentration in the present of 100 nM 6th-62-40 and 20 nM CRP.  $\lambda_{ex} = 425$  nm. Error bars showed the standard deviation of measurement taken from three experiments.  $F_0$  and  $F$  are the fluorescence intensity in the absence and presence of CRP respectively.

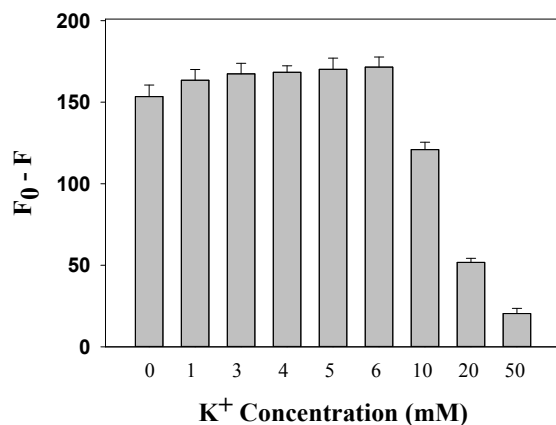

**Fig. S3** Optimization of  $K^+$  ions concentration. The change of fluorescence signal on 490 nm was not affected obviously  $K^+$  concentration below 6 mM in the present of 100 nM aptamer and 4 μM ThT.  $\lambda_{ex} = 425$  nm.

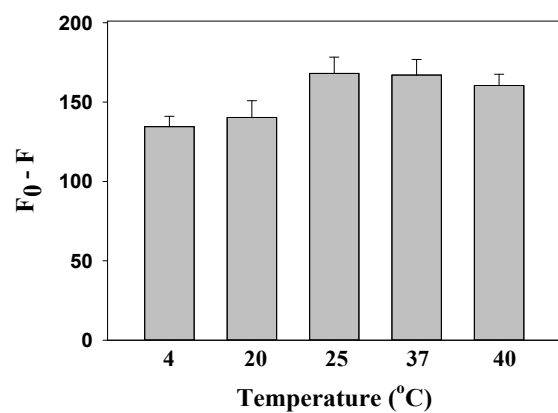

**Fig. S4** Optimization of reaction temperature. The change of fluorescence on 490 nm was maximum at 25 °C.  $\lambda_{ex} = 425$  nm.

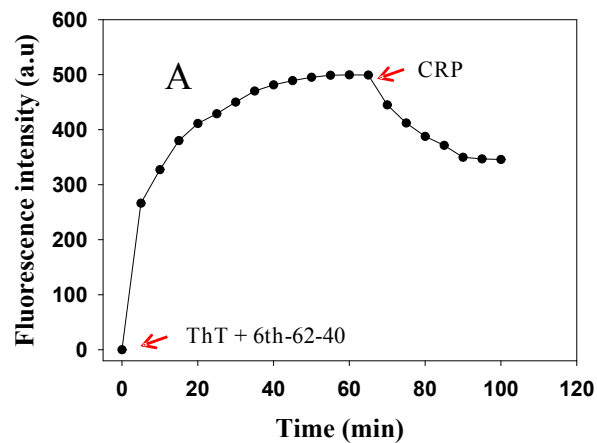

**Fig. S5** Optimization of incubation time. Record the fluorescence intensity on 490 nm per 5 min in the present of 100 nM aptamer and 4  $\mu$ M ThT. The fluorescence of 6th-62-40/ThT reached the maximum value after 1 h, then 20 nM CPR were added and record the fluorescence intensity on 490 nm per 5 min.  $\lambda_{ex} = 425$  nm.

**Table S1** CRP detection performance comparison of our strategy with other methods.

| Methods           | Detection limit | Reference                                             |
|-------------------|-----------------|-------------------------------------------------------|
| Electrochemical   | 150 pM          | <i>Anal. Chem.</i> , 2014, 86, 5553-5558              |
|                   | 0.87 nM         | <i>Phys. Chem. Chem. Phys.</i> , 2010, 12, 9176-9182. |
| Fluorescence      | 10 pM           | <i>Chem. Commun.</i> , 2016, 52, 3883-3886            |
|                   | 87 pM           | <i>Biosens. Bioelectron.</i> , 2009, 24, 1456-1461.   |
| SPR               | 10.4 pM         | <i>Analyst</i> , 2015, 140, 4445-4452                 |
|                   | 7 zM            | <i>Sci. Rep.</i> , 2014, 4, 5129.                     |
|                   | 10 pM           | <i>Chem. Commun.</i> , 2016, 52, 3568-3571.           |
| Chemiluminescence | 1.1 nM          | <i>Biosens. Bioelectron.</i> , 2009, 24, 3091-3096.   |
|                   | 8.1 pM          | <i>ACS Nano</i> , 2012, 6, 2978–2983.                 |
| Fluorescence      | 380 pM          | This work                                             |
